# Supplementary material for: Probing the determinants of porosity in protein frameworks: co-crystals of cytochrome c and an octa-anionic calix[4]arene
Source: Royal Society of Chemistry journal article supplement (doi:10.1039/c9ob02275a), 2019-12-03
Supplement: c9ob02275a1.pdf [file c9ob02275a1.pdf]

*Supporting Information*

**Probing the Determinants of Porosity in Protein Frameworks:**

**Co-crystals of Cytochrome *c* and an Octa-anionic Calix[4]arene**

Jimi M. Alex,<sup>a</sup> Giovanna Brancatelli,<sup>b</sup> Stefano Volpi,<sup>c</sup> Carmela Bonaccorso,<sup>d</sup> Alessandro Casnati,<sup>c</sup> Silvano Geremia,<sup>\*,b</sup> Peter B. Crowley<sup>\*,a</sup>

<sup>a</sup>School of Chemistry, National University of Ireland, University Road, Galway, H91 TK33, Ireland.

<sup>b</sup>Centre of Excellence in Biocrystallography, Department of Chemical and Pharmaceutical Sciences, University of Trieste, via L. Giorgieri 1, 34127 Trieste, Italy

<sup>c</sup>Dipartimento di Scienze Chimiche, della Vita e della Sostenibilità Ambientale, Università degli Studi di Parma, delle Scienze 17/A, 43124 Parma, Italy

<sup>d</sup>Dipartimento di Scienze Chimiche, Università degli Studi di Catania, viale Andrea Doria 6, 95125, Catania

\*Correspondence to:

peter.crowley@nuigalway.ie / +353 91 49 24 80

sgeremia@units.it / +39 040 558 3936

**Keywords**

assembly, calixarene, molecular glue, protein frameworks, supramolecular scaffolds

## Experimental

**Sample preparation.** **sclx<sub>4</sub>mc** was synthesized, as described.<sup>1</sup> Millimolar stock solutions of the ligand were prepared in water at pH 6.0. Unlabelled *Saccharomyces cerevisiae* cytc (C102T) was produced as reported,<sup>2</sup> and horse heart cytc was from Sigma-Aldrich.

**Co-crystallization trials.** An Oryx8 Robot (Douglas Instruments) and a sparse matrix screen (JCSG++, Jena Bioscience) were used for co-crystallization of yeast cytc and **sclx<sub>4</sub>mc** at 20° C. Protein and calixarene were tested at ratios of 1:1, 1:5 and 1:25. Crystals grew only in 1:1 ratio in condition F2 comprising 3.15 M ammonium sulfate and 0.1 M sodium citrate pH 5.0. Horse cytc and **sclx<sub>4</sub>mc** were co-crystallized by the hanging drop vapour diffusion method at 20° C, from 52-62 % PEG 3350 and 0.05 M sodium cacodylate at pH 5.5. Drops were prepared by mixing 1 µL of 1.7 mM protein, 0.5 µL of 17 mM ligand and 1.7 mM gadolinium chloride, with 1 µL of reservoir solution. Crystal growth occurred in 56 % PEG 3350 after 4 days.

**X-ray data collection.** Crystals of ~100 µm dimension were cryo-protected in the reservoir solution supplemented with 20 % glycerol and cryo-cooled in liquid nitrogen. Diffraction data were collected to 1.7 Å resolution for the yeast cytc – **sclx<sub>4</sub>mc** crystal using  $\phi$  scans of 0.1° over 360° with an Eiger X 9M detector (PROXIMA-2A, SOLEIL synchrotron). A dataset extending to 2.5 Å resolution was collected for the horse cytc – **sclx<sub>4</sub>mc** crystal using  $\phi$  scans of 0.5° over 100° with a PILATUS detector (XRD1 beamline, Elettra Synchrotron).

**X-ray structure determination.** The observed reflections were processed with the autoPROC pipeline<sup>3</sup> (yeast cytc – **sclx<sub>4</sub>mc**) or XDS<sup>4</sup> (horse cytc – **sclx<sub>4</sub>mc**). In both cases the data were scaled using POINTLESS<sup>5</sup> and AIMLESS<sup>6</sup>. *Xtriage* (PHENIX) analysis of the horse cytc – **sclx<sub>4</sub>mc** dataset indicated a perfect merohedral twin and a twin law of h, -k, -l was required for refinement.<sup>7</sup> The two structures were solved by molecular replacement in PHASER<sup>8</sup> using 5LYC (yeast cytc) or 1HRC (horse cytc) as the search models. The calixarene coordinates and restraints were generated in JLigand.<sup>9</sup> Iterative cycles of model building in COOT<sup>10</sup> and refinement were performed with BUSTER<sup>11</sup> (yeast cytc – **sclx<sub>4</sub>mc**) or REFMAC5<sup>12</sup> (horse cytc – **sclx<sub>4</sub>mc**) until no further improvements in the  $R_{\text{free}}$  or electron density were obtained. The final structures were validated with MolProbity<sup>13</sup> and deposited in the Protein Data Bank as PDB 6suy (yeast cytc – **sclx<sub>4</sub>mc**) and PDB 6suv (horse cytc – **sclx<sub>4</sub>mc**).

```

Yeast cytc   AEFKA   1   GSAKKGATLF   10   KTRCLQCHTV   20   EKGGPHKVGP   30
Horse cytc   ----- GDVEKGGKIF   VQKCAQCHTV   EKGGKHKKTGP
              *   **   *           * * * * *   * * * * * * *
              *   * * * * *

Yeast cytc           NLHGIFGRHS   40   GQAEGYSYTD   50   ANIKKNVLWD   60
Horse cytc           NLHGLFGRKT   GQAPGFYTD   ANKNKGITWK
              * * * * * * *   * * * *   * * * *   * *   *   *

Yeast cytc           ENNMSEYLTN   70   PKKYIPGTKM   80   AFGGLKKEKD   90
Horse cytc           EETLMEYLEN   PKKYIPGTKM   IFAGIKKKTE
              *           * * * * *   * * * * * * * * * *   * * * *

Yeast cytc           RNDLITYLKK   100  ATE-
Horse cytc           REDLIAYLKK   ATNE
              *   * * * * * * * * * *   * *

```

**Fig. S1** Alignment of the yeast and horse heart cytc primary structures.<sup>14</sup> Conserved residues are highlighted with an asterisk.

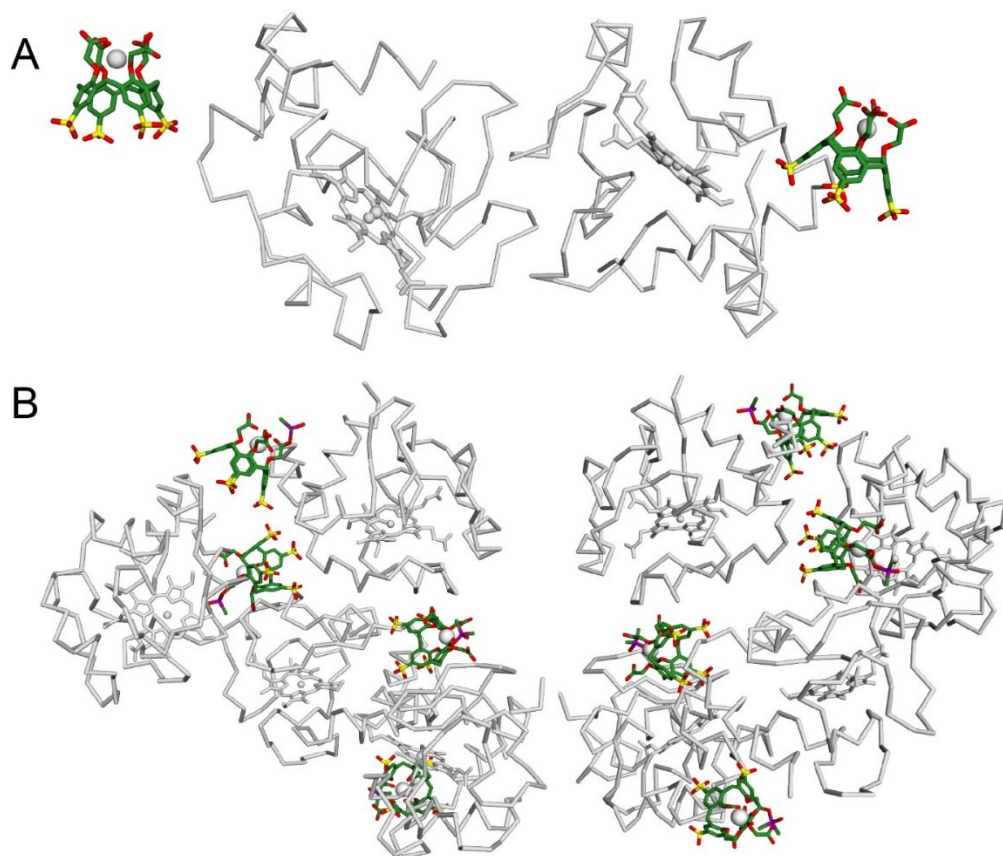

**Fig. S2** The asymmetric units of (A) yeast cytc – sclx<sub>4</sub>mc and (B) horse cytc – sclx<sub>4</sub>mc comprising 2 or 8 proteins, respectively. The proteins, calixarenes and sodium ions are shown in grey, green, and white.

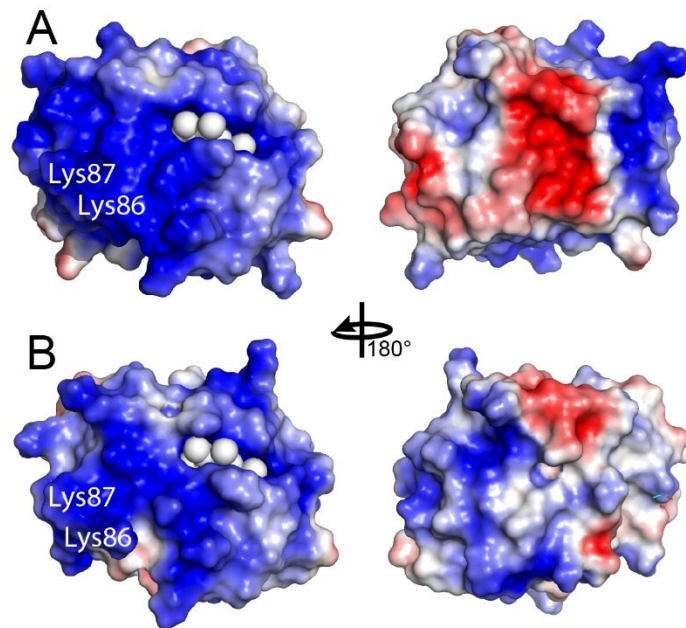

**Fig. S3** The electrostatic surface potentials showing the cationic (blue) and anionic (red) patches of **(A)** yeast cytc and **(B)** horse cytc (APBS Electrostatics, PyMOL). The conserved residues Lys86 and Lys87, which comprise the binding site in both variants are indicated. Heme edge is shown as spheres

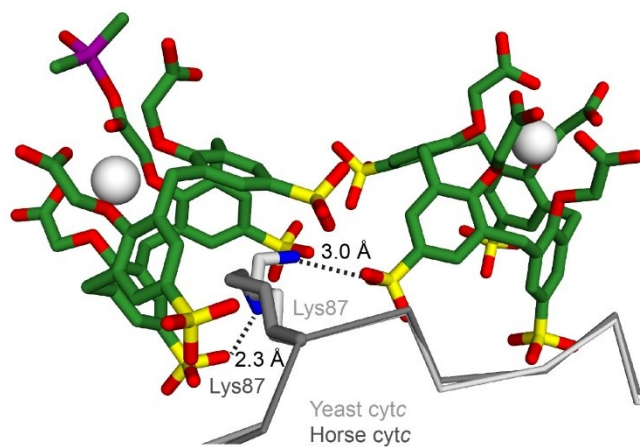

**Fig. S4** Superposition of yeast (light grey) and horse cytc (dark grey) highlights the binding of **sclx<sub>4</sub>mc** to a similar site on each protein. While Lys87 is encapsulated in horse cytc, it interacts laterally in the yeast cytc case.

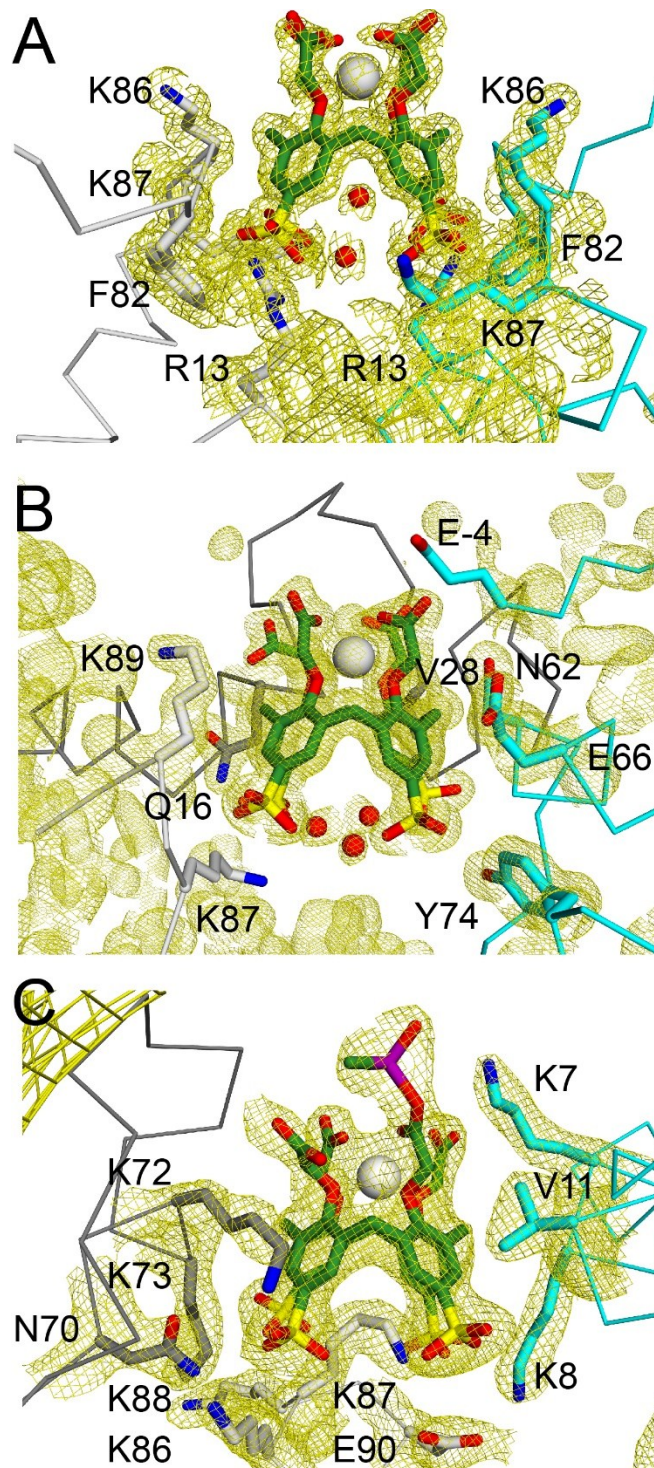

**Fig. S5**  $2F_o - F_c$  electron density maps (contoured at  $1.0 \sigma$ ) for the protein – *sclx*<sub>4</sub>*mc* interfaces in the (A, B) yeast and (C) horse cytc complexes (See main text Fig. 2).

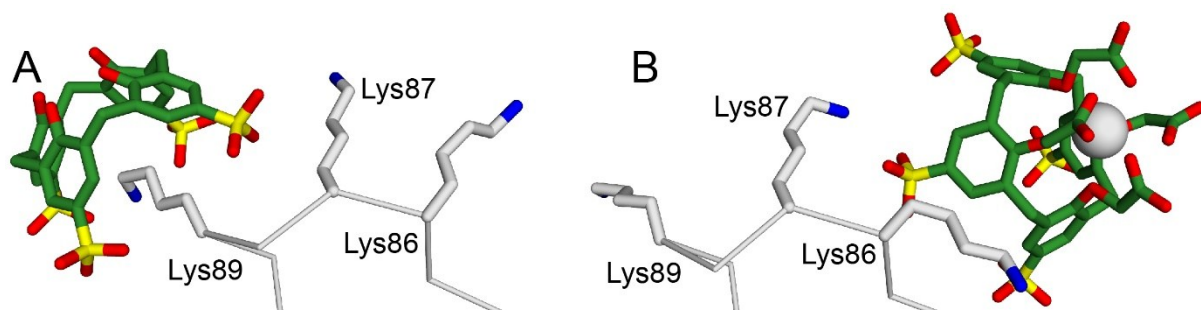

**Fig. S6** Calixarene complexation of yeast cytochrome c. **(A)** The side chain of Lys89 encapsulated by **sclx<sub>4</sub>** (PDB 3tyi) and **(B)** **sclx<sub>4</sub>mc** interacted with Lys86 by an *exo* CH- $\pi$  bond and with Lys87 by a weak salt bridge (see also Fig. S4).



**Table S1.** X-ray data collection, processing and refinement statistics

|                                                   | Yeast cytc – <b>sclx<sub>4</sub>mc</b>                                                                   | Horse cytc – <b>sclx<sub>4</sub>mc</b>                                                       |
|---------------------------------------------------|----------------------------------------------------------------------------------------------------------|----------------------------------------------------------------------------------------------|
| <i>Data Collection</i>                            |                                                                                                          |                                                                                              |
| Light source                                      | SOLEIL, PROXIMA-2A                                                                                       | Elettra, XRD1                                                                                |
| Wavelength (Å)                                    | 0.97624                                                                                                  | 1.0000                                                                                       |
| Space group                                       | <i>P</i> 3 <sub>2</sub> 21                                                                               | <i>P</i> 4 <sub>3</sub>                                                                      |
| Cell constants                                    | <i>a</i> = <i>b</i> = 102.48 Å<br><i>c</i> = 180.00 Å<br>$\alpha = \beta = 90^\circ, \gamma = 120^\circ$ | <i>a</i> = <i>b</i> = 65.59 Å<br><i>c</i> = 250.69 Å<br>$\alpha = \beta = \gamma = 90^\circ$ |
| Resolution (Å)                                    | 56.00-1.74 (1.77-1.74)                                                                                   | 46.38 – 2.50 (2.60-2.50)                                                                     |
| # reflections                                     | 904004 (42248)                                                                                           | 94255 (9021)                                                                                 |
| # unique reflections                              | 44640 (2207)                                                                                             | 34903 (3775)                                                                                 |
| Multiplicity                                      | 20.3 (19.1)                                                                                              | 2.7 (2.4)                                                                                    |
| <i>I</i> / $\sigma$ ( <i>I</i> )                  | 15.7 (2.2)                                                                                               | 5.9 (2.6)                                                                                    |
| Completeness (%)                                  | 100 (100)                                                                                                | 96.3 (92.6)                                                                                  |
| <i>R</i> <sub>pim</sub> <sup>b</sup> (%)          | 3.4 (44.0)                                                                                               | 10.1 (24.3)                                                                                  |
| CC <sub>1/2</sub>                                 | 99.8 (77.9)                                                                                              | 94.3 (73.9)                                                                                  |
| Solvent content (%)                               | 73                                                                                                       | 57                                                                                           |
| <i>Refinement</i>                                 |                                                                                                          |                                                                                              |
| <i>R</i> <sub>work</sub>                          | 0.1665                                                                                                   | 0.1754                                                                                       |
| <i>R</i> <sub>free</sub>                          | 0.1790                                                                                                   | 0.2365                                                                                       |
| rmsd bonds (Å)                                    | 0.0101                                                                                                   | 0.0114                                                                                       |
| rmsd angles (°)                                   | 1.0858                                                                                                   | 3.6120                                                                                       |
| asymmetric unit composition                       |                                                                                                          |                                                                                              |
| protein                                           | 2                                                                                                        | 8                                                                                            |
| <b>sclx<sub>4</sub>mc</b>                         | 2                                                                                                        | 8                                                                                            |
| sodium                                            | 2                                                                                                        | 8                                                                                            |
| acetate                                           | 0                                                                                                        | 8                                                                                            |
| cacodylate                                        | 0                                                                                                        | 8                                                                                            |
| sulfate                                           | 5                                                                                                        | 0                                                                                            |
| water                                             | 280                                                                                                      | 423                                                                                          |
| Ave. B-factor (Å <sup>2</sup> )                   | 31.19                                                                                                    | 25.67                                                                                        |
| Clashscore                                        | 1.09                                                                                                     | 6.40                                                                                         |
| Ramachandran analysis, <sup>c</sup> % residues in |                                                                                                          |                                                                                              |
| favoured regions                                  | 98.1                                                                                                     | 97.9                                                                                         |
| allowed regions                                   | 100                                                                                                      | 100                                                                                          |
| PDB code                                          | 6suy                                                                                                     | 6suv                                                                                         |

<sup>a</sup>Values in parentheses correspond to the highest resolution shell

$$^b R_{\text{pim}} = \frac{\sum_{hkl} \sqrt{(1/n-1) \sum_{i=1}^n |I_i(hkl) - \langle I(hkl) \rangle|}}{\sum_{hkl} \sum_i I_i(hkl)}$$

<sup>c</sup>Determined in MolProbity

## References

- 1 A. Casnati, Y. Ting, D. Berti, M. Fabbi, A. Pochini and R. Ungaro, D. Sciotto and G. Lombard, *Tetrahedron*, 1993, **49**, 9815.
- 2 (a) P. B. Crowley, P. Ganji and H. Ibrahim, *ChemBioChem*, 2008, **9**, 1029; (b) R. E. McGovern, H. Fernandes, A. R. Khan, N. P. Power and P. B. Crowley, *Nat. Chem.*, 2012, **4**, 527.
- 3 C. Vonrhein, C. Flensburg, P. Keller, A. Sharff, O. Smart, W. Paciorek, T. Womack and G. Bricogne, *Acta Crystallogr. Sect. D: Biol. Crystallogr.*, 2011, **D67**, 293.
- 4 W. Kabsch, *Acta Crystallogr. Sect. D: Biol. Crystallogr.*, 2010, **D66**, 125.
- 5 P. R. Evans, *Acta Crystallogr. Sect. D: Biol. Crystallogr.*, 2011, **D67**, 282.
- 6 P. R. Evans and G. N. Murshudov, *Acta Crystallogr., Sect. D: Biol. Crystallogr.*, 2013, **D69**, 1204.
- 7 P. D. Adams, P. V. Afonine, G. Bunkóczi, V. B. Chen, I. W. Davis, N. Echols, J. J. Headd, L.-W. Hung, G. J. R. Kapral, W. Grosse-Kunstleve, A. J. McCoy, N. W. Moriarty, R. Oeffner, R. J. Read, D. C. Richardson, J. S. Richardson, T. C. Terwilliger and P. H. Zwart, *Acta Crystallogr. Sect. D: Biol. Crystallogr.*, 2010, **D66**, 213.
- 8 A. J. McCoy, R. W. Grosse-Kunstleve, P. D. Adams, M. D. Winn, L. C. Storoni and R. J. Read, *J. Appl. Crystallogr.*, 2007, **40**, 658.
- 9 E. Potterton, P. Briggs, M. Turkenburg and E. A. Dodson, *Acta Crystallogr. Sect. D: Biol. Crystallogr.*, 2003, **D59**, 1131.
- 10 P. Emsley, B. Lohkamp, W. G. Scott and K. Cowtan, *Acta Crystallogr. Sect. D: Biol. Crystallogr.*, 2010, **D66**, 486.
- 11 O. S. Smart, T. O. Womack, C. Flensburg, P. Keller, W. Paciorek, A. Sharff, C. Vonrhein and G. Bricogne, *Acta Crystallogr. Sect. D: Biol. Crystallogr.*, 2012, **D68**, 368.
- 12 A. A. Vagin, R. A. Steiner, A. A. Lebedev, L. Potterton, S. McNicholas, F. Long and G. N. Murshudov, *Acta Crystallogr. Sect. D: Biol. Crystallogr.*, 2004, **60**, 2184.
- 13 V. B. Chen, W. B. Arendall, J. J. Headd, D. A. Keedy, R. M. Immormino, G. J. Kapral, L. W. Murray, J. S. Richardson and D. C. Richardson, *Acta Crystallogr. Sect. D: Biol. Crystallogr.*, 2010, **D66**, 12.
- 14 F. Madeira, Y. m. Park, J. Lee, N. Buso, T. Gur, N. Madhusoodanan, P. Basutkar, A. R.N. Tivey, S. C. Potter, R. D. Finn and R. Lopez, *Nucleic Acids Res.*, 2019, **47**, 636.
